# Supplementary material
Source: PubMed Central journal article supplement (PMC5954827)
Supplement: NIHMS950334-supplement-Figure_S1.pdf [file NIHMS950334-supplement-Figure_S1.pdf]

# Supporting information for: Visualizing ensembles in structural biology

Ryan L. Melvin and Freddie R. Salsbury, Jr\*

*Department of Physics, Wake Forest University, Winston-Salem, NC 27106*

E-mail: salsbufr@wfu.edu

Phone: +1 (336) 758 5337. Fax: +1 (336) 758 6142

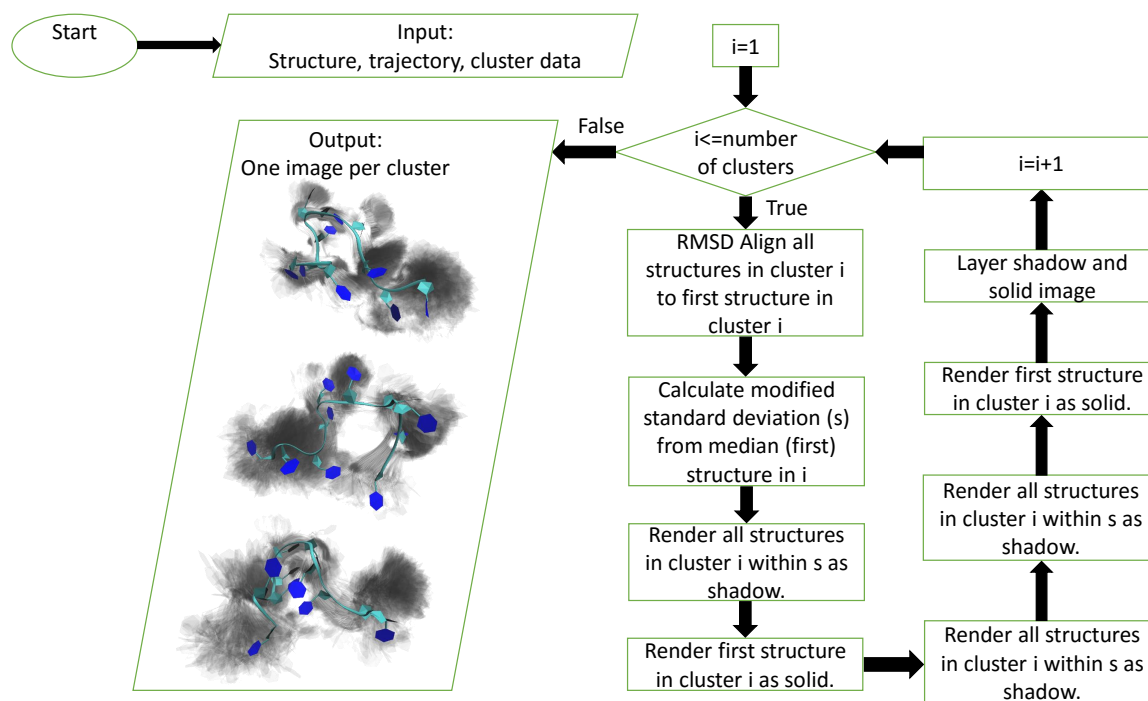

Figure S1: The python script vsigma.py uses the above workflow to generate images with shadows representing uncertainty from a structure file, MD trajectory and set of frames organized by cluster. Scripts available at <http://dx.doi.org/10.6084/m9.figshare.1601897> .
